# Supplementary material
Source: MDPI journal article supplement (https://www.mdpi.com/1996-1073/5/9/3381)
Supplement: s1 [file s1]

*Correction*

## **Correction: Wang, L. Exergoeconomic Evaluation of a Modern Ultra-Supercritical Power Plant. *Energies* 2012, 5, 3381-3397**

**Ligang Wang, Yongping Yang \*, Changqing Dong, Zhiping Yang, Gang Xu and Lingnan Wu**

School of Energy, Power and Mechanical Engineering, North China Electric Power University, Beinong Road 2, Beijing 102206, China; E-Mails: lgwangeao@163.com (L.W.); cqdong1@163.com (C.D.); yzpr@163.com (Z.Y.); xg2008@ncepu.edu.cn (G.X.); wulingnan@126.com (L.W.)

\* Author to whom correspondence should be addressed; E-Mail: yyp@ncepu.edu.cn; Tel.: +86-10-6177-2011; Fax: +86-10-6177-2012.

*Received: 24 September 2012 / Published: 24 September 2012*

---

A new version of the paper [1] was uploaded today. In the new version the authors have modified the acknowledgement section as follows:

### **Acknowledgements**

The authors would like to thank China 973 Project “Tempo-Spatial Distribution of Energy Consumption, Evaluation Method and System Integration for Large-scale Coal-fired Power Generation Unit” (2009CB219801), National Science Fund for Distinguished Young Scholars (51025624) and National nature Science Fund of China (51006034) for the financial supports. The authors would also thank Marco Bettiol for the initial modeling of the plant, and thank Andrea Lazzaretto and George Tsatsaronis for their suggestions on exergoeconomic part.

We apologize for any inconvenience caused to the readers.

### **References**

1. Wang, L.; Yang, Y.; Dong, C.; Yang, Z.; Xu, G.; Wu, L. Exergoeconomic Evaluation of a Modern Ultra-Supercritical Power Plant. *Energies* **2012**, *5*, 3381–3397.

© 2012 by the authors; licensee MDPI, Basel, Switzerland. This article is an open access article distributed under the terms and conditions of the Creative Commons Attribution license (<http://creativecommons.org/licenses/by/3.0/>).
